# Supplementary material
Source: PubMed Central journal article supplement (PMC4124064)
Supplement: pr500202e_si_001.pdf [file pr500202e_si_001.pdf]

Supplemental Table S1. Identified target peptides at 1% FDR.

|                       | Mascot | SEQUEST | MS Amanda |
|-----------------------|--------|---------|-----------|
| HCD HeLa Replicate 1  | 8,924  | 9,417   | 10,841    |
| HCD HeLa Replicate 2  | 10,025 | 10,909  | 12,101    |
| HCD HeLa Replicate 3  | 10,119 | 10,530  | 11,773    |
| HCD PepLib Phospho    | 26,495 | 22,976  | 27,414    |
| HCD PepLib No Phospho | 31,835 | 34,861  | 35,418    |
| ETD PepLib Phospho    | 6,196  | -       | 6,890     |
| ETD PepLib No Phospho | 6,368  | -       | 8,018     |
| CID HeLa Replicate 1  | 5,288  | 5,372   | 5,442     |
| CID HeLa Replicate 2  | 5,342  | 5,356   | 5,642     |
| CID HeLa Replicate 3  | 5,576  | 5,560   | 5,746     |

Supplemental Table S2. Identified target PSMs at 1% FDR.

|                       | Mascot  | SEQUEST | MS Amanda |
|-----------------------|---------|---------|-----------|
| HCD HeLa Replicate 1  | 12,386  | 12,858  | 15,091    |
| HCD HeLa Replicate 2  | 13,761  | 14,628  | 16,305    |
| HCD HeLa Replicate 3  | 13,537  | 14,223  | 15,984    |
| HCD Histone           | 620     | 778     | 969       |
| HCD PepLib Phospho    | 72,771  | 62,031  | 75,605    |
| HCD PepLib No Phospho | 103,999 | 112,491 | 118,491   |
| ETD PepLib Phospho    | 12,016  | -       | 12,979    |
| ETD PepLib No Phospho | 13,489  | -       | 16,400    |
| CID HeLa Replicate 1  | 6,895   | 6,961   | 7,046     |
| CID HeLa Replicate 2  | 7,093   | 7,077   | 7,409     |
| CID HeLa Replicate 3  | 7,091   | 7,152   | 7,373     |

Supplemental Table S3. Performance comparison of MS Amanda and Morpheus on HCD HeLa data set<sup>30</sup> at 1% FDR. Search settings and modifications were as described above: 7 ppm precursor mass tolerance, 0.03 Da fragment mass tolerance, Oxidation (M) as variable modification, Carbamidomethyl (C) as fixed modification, and trypsin as enzyme allowing up to two missed cleavages.

|                      | Morpheus | MS Amanda |
|----------------------|----------|-----------|
| HCD HeLa Replicate 1 | 12,060   | 15,091    |
| HCD HeLa Replicate 2 | 12,019   | 16,305    |
| HCD HeLa Replicate 3 | 11,068   | 15,984    |

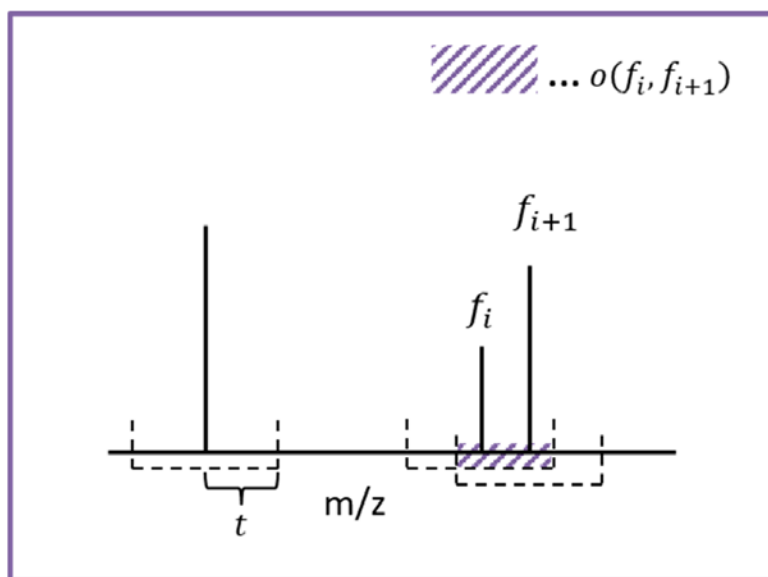

Supplemental Figure S1. Schematic view of overlap calculation for fragments ions given mass tolerance  $t$  (see Formula 4). Each peak covers an  $m/z$  range of  $2 \cdot t$ , leading to potential overlaps of covered range for nearby peaks. The probability to match a peak by chance is given by the fraction of covered range and total  $m/z$  range. For calculation of the covered range overlapping areas (marked areas in Figure) are subtracted from the sum of all peak ranges.
